# Supplementary material for: Rapid thermal lysis of cells using silicon–diamond microcantilever heaters
Source: Royal Society of Chemistry journal article supplement (doi:10.1039/b923791g), 2010-01-01
Supplement: b923791g.pdf [file b923791g.pdf]

## Rapid Thermal Lysis of Cells using Silicon-Diamond Microcantilever Heaters

Natalya Privorotskaya<sup>1\*</sup>, Yi-Shao Liu<sup>2\*</sup>, Jungchul Lee<sup>1</sup>, Hongjun Zeng<sup>5</sup>,  
John A. Carlisle<sup>5</sup>, Adarsh Radadia<sup>2,4</sup>, Larry Millet<sup>2,4</sup>, Rashid Bashir<sup>2,3,4</sup>, and William P.  
King<sup>1,4</sup>

<sup>1</sup>*Department of Mechanical Science and Engineering, University of Illinois Urbana-Champaign*

<sup>2</sup>*Department of Electrical and Computer Engineering, University of Illinois Urbana-Champaign*

<sup>3</sup>*Department of Bioengineering, University of Illinois Urbana-Champaign*

<sup>4</sup>*Micro and Nanotechnology Laboratory, University of Illinois Urbana-Champaign*

<sup>5</sup>*Advanced Diamond Technologies, Inc., Romeoville IL*

### List of Figure Captions – Supplemental Material

Figure 1. a) Simulation showing heating of 20  $\mu$ l of solution containing suspended NIH 3T3 fibroblast cells or *L. monocytogenes* V7 upon electrical heating of Si-UNCD cantilever free end to 93 °C. Cross-section is taken 50  $\mu$ m from the cantilever free end, where cantilever temperature is maximum; b) a close-up view of the cantilever free end and surrounding solution for the same conditions as in a). The monolayer of cells on the cantilever surface is within 9% of the targeted temperature value.

Figure 2. Overlaid images of the cells with various fluorescent stains showing co-localisation of cell membranes and nucleuses before and after cell lysis.

Figure 3. a) SEM image of *Listeria monocytogenes* V7 on Si-UNCD cantilever, b) close up view of bacteria on UNCD surface.

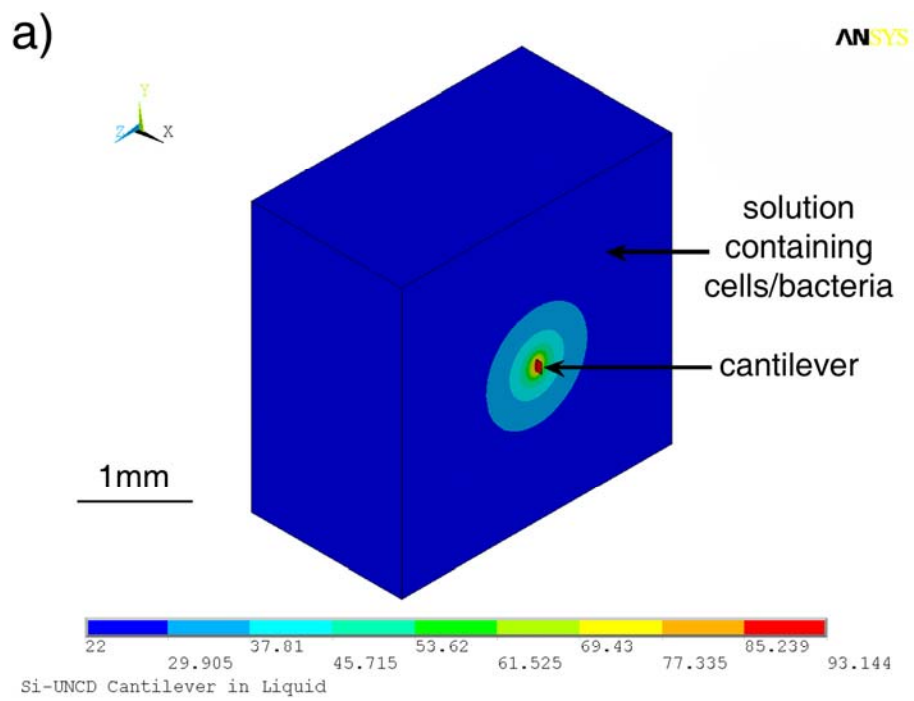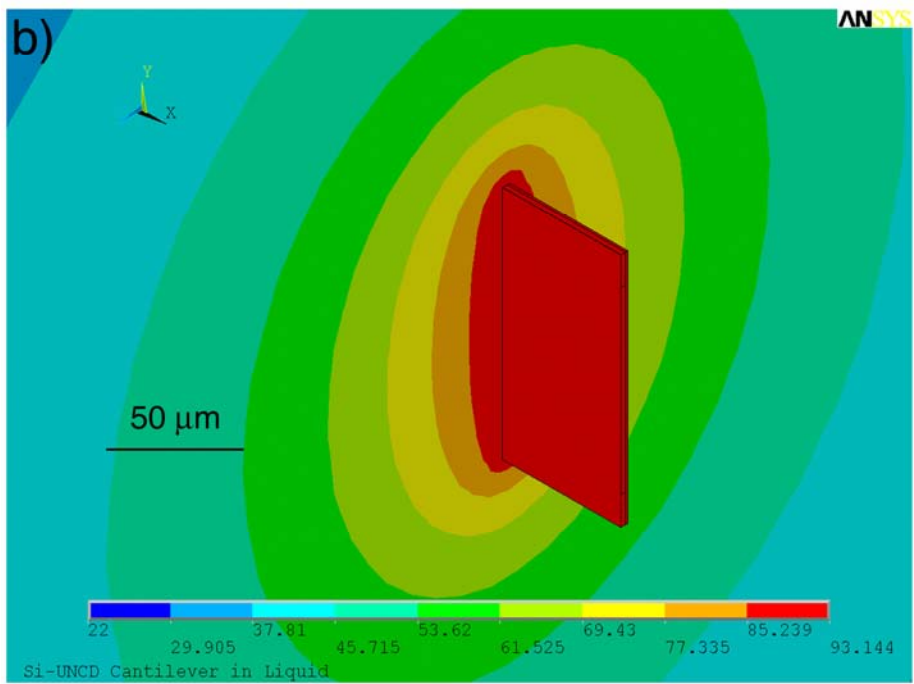

**Figure 1.**

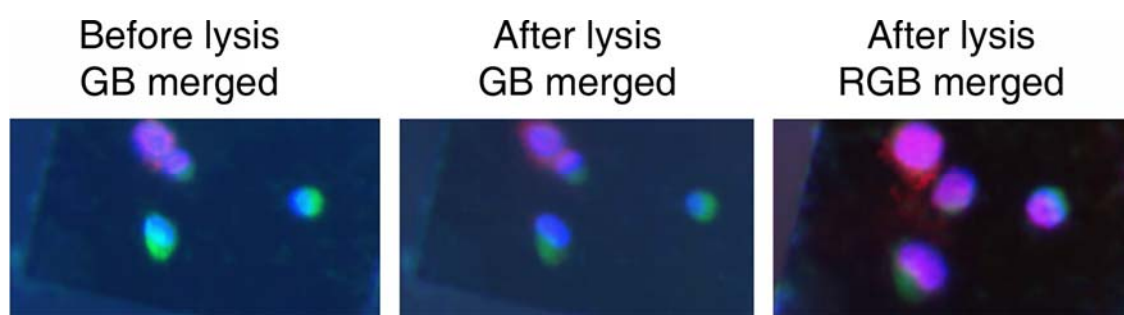

**Figure 2.**

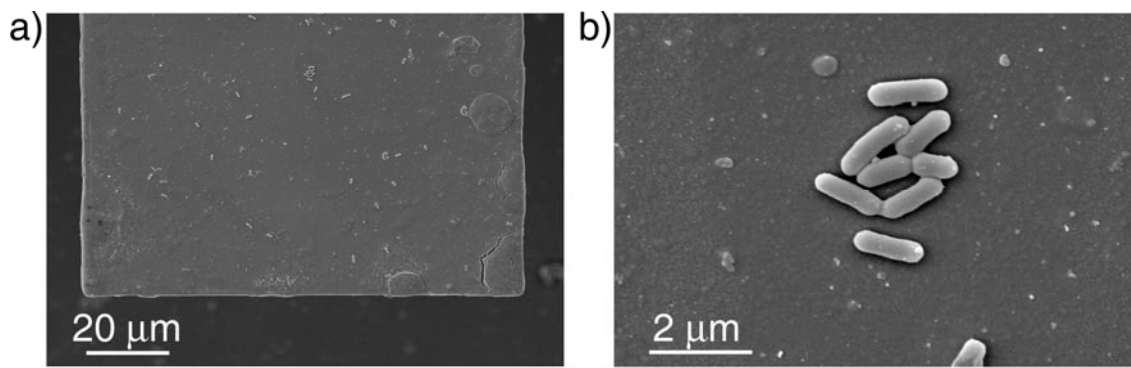

**Figure 3.**
